# Supplementary material
Source: Elsevier journal article supplement (https://www.sciencedirect.com/science/article/pii/S0213911115000588)
Supplement: mmc1 [file S0213911115000588:mmc1.docx]

**Apéndice**

**Tabla I**

Fallecimientos totales, años potenciales de vida perdidos (APVP), fallecimientos antes de los 65 años de edad y años potenciales de vida laboral perdidos (APVLP) asociados a fallecimientos prematuros por lesiones de tránsito

| *Fallecimientos totales* | **2002** | **2003** | **2004** | **2005** | **2006** | **2007** | **2008** | **2009** | **2010** | **2011** | **2012** | **Total** |
| --- | --- | --- | --- | --- | --- | --- | --- | --- | --- | --- | --- | --- |
| Varones | 4.034 | 4.060 | 3.589 | 3.389 | 3.090 | 2.856 | 2.246 | 1.942 | 1.755 | 1.570 | 1.416 | 29.947 |
| Mujeres | 1.201 | 1.216 | 1.087 | 919 | 873 | 762 | 619 | 538 | 484 | 466 | 410 | 8.575 |
| Total | 5.235 | 5.276 | 4.676 | 4.308 | 3.963 | 3.618 | 2.865 | 2.480 | 2.239 | 2.036 | 1.826 | 38.522 |
| *APVP* |  |  |  |  |  |  |  |  |  |  |  |  |
| Varones | 150.308 | 153.840 | 135.133 | 128.424 | 119.434 | 108.808 | 84.750 | 70.980 | 63.483 | 55.167 | 48.481 | 1.118.808 |
| Mujeres | 44.967 | 46.462 | 41.170 | 33.718 | 31.863 | 28.468 | 22.446 | 19.869 | 17.302 | 14.876 | 13.151 | 314.294 |
| Total | 195.275 | 200.302 | 176.303 | 162.142 | 151.297 | 137.277 | 107.196 | 90.849 | 80.785 | 70.044 | 61.632 | 1.433.103 |
| *Fallecimientos <65 años* |  |  |  |  |  |  |  |  |  |  |  |  |
| Varones | 3.270 | 3.336 | 2.903 | 2.771 | 2.563 | 2.373 | 1.811 | 1.532 | 1.368 | 1.211 | 1.058 | 21.253 |
| Mujeres | 802 | 834 | 739 | 610 | 569 | 503 | 402 | 358 | 294 | 258 | 222 | 5.591 |
| Total | 4.072 | 4.170 | 3.642 | 3.381 | 3.132 | 2.876 | 2.213 | 1.890 | 1.662 | 1.469 | 1.280 | 26.844 |
| *APVLP* |  |  |  |  |  |  |  |  |  |  |  |  |
| Varones | 98.440 | 102.016 | 87.999 | 83.531 | 76.769 | 69.519 | 53.304 | 43.145 | 37.832 | 32.093 | 27.910 | 712.558 |
| Mujeres | 23.926 | 25.483 | 22.145 | 17.755 | 16.287 | 14.968 | 11.294 | 10.038 | 8.461 | 6.796 | 6.018 | 163.171 |
| Total | 122.366 | 127.499 | 110.144 | 101.286 | 93.056 | 84.487 | 64.598 | 53.183 | 46.293 | 38.889 | 33.928 | 875.729 |

Fuente: elaboración propia a partir del *Registro de defunciones por causa de muerte* y de información sobre esperanza de vida y riesgos de muerte publicados por el Instituto Nacional de Estadística8.

**Tabla II**

Fallecimientos totales, años potenciales de vida perdidos (APVP), fallecimientos antes de los 65 años de edad y años potenciales de vida laboral perdidos (APVLP), y pérdidas laborales asociadas a fallecimientos prematuros por lesiones de tránsito (peso relativo sobre todas las causas)

| *Fallecimientos <65 años* | **2002** | **2003** | **2004** | **2005** | **2006** | **2007** | **2008** | **2009** | **2010** | **2011** | **2012** | **Total** |
| --- | --- | --- | --- | --- | --- | --- | --- | --- | --- | --- | --- | --- |
| Varones | 7,30 | 7,31 | 6,44 | 6,10 | 5,73 | 5,24 | 4,05 | 3,54 | 3,24 | 2,92 | 2,57 | 4,39 |
| Mujeres | 4,37 | 4,37 | 3,94 | 3,24 | 3,04 | 2,60 | 2,05 | 1,85 | 1,55 | 1,34 | 1,16 | 2,67 |
| Total | 6,44 | 6,45 | 5,71 | 5,26 | 4,93 | 4,45 | 3,44 | 3,02 | 2,72 | 2,41 | 2,13 | 3,87 |
| *APVLP* |  |  |  |  |  |  |  |  |  |  |  |  |
| Varones | 13,59 | 13,95 | 12,38 | 11,90 | 11,35 | 10,37 | 8,19 | 7,07 | 6,52 | 5,72 | 5,13 | 9,95 |
| Mujeres | 7,80 | 7,96 | 7,20 | 5,86 | 5,48 | 4,95 | 3,72 | 3,39 | 2,98 | 2,37 | 2,18 | 4,97 |
| Total | 11,86 | 12,12 | 10,82 | 10,08 | 9,56 | 8,72 | 6,77 | 5,87 | 5,35 | 4,59 | 4,14 | 8,38 |
| *Pérdidas laborales* |  |  |  |  |  |  |  |  |  |  |  |  |
| Varones | 13,86 | 14,28 | 12,81 | 12,22 | 11,76 | 10,85 | 8,57 | 7,42 | 6,89 | 6,12 | 5,46 | 10,39 |
| Mujeres | 8,84 | 8,98 | 8,03 | 6,59 | 6,25 | 5,52 | 4,13 | 3,79 | 3,29 | 2,61 | 2,41 | 5,28 |
| Total | 13,13 | 13,46 | 12,04 | 11,30 | 10,81 | 9,86 | 7,66 | 6,61 | 6,08 | 5,28 | 4,74 | 9,42 |

Fuente: elaboración propia a partir del *Registro de defunciones por causa de muerte* y de información sobre esperanza de vida y riesgos de muerte publicados por el Instituto Nacional de Estadística8.

**Tabla III**

Comparación de los resultados de mortalidad ofrecidos por la Dirección General de Tráfico (DGT) y el *Registro de defunciones por causa de muerte* del Instituto Nacional de Estadística (INE)

|  | **2000** | **2001** | **2002** | **2003** | **2004** | **2005** | **2006** | **2007** | **2008** | **2009** | **2010** |  | **2011** | | **2012** | | **Total** | |
| --- | --- | --- | --- | --- | --- | --- | --- | --- | --- | --- | --- | --- | --- | --- | --- | --- | --- | --- |
| Estadística DGT fallecidos a 30 días | 5.776 | 5.517 | 5.347 | 5.399 | 4.741 | 4.442 | 4.104 | 3.823 | 3.100 | 2.714 | **2.478** |  | **2.060a** | | 1.903a | | 40.111 | |
| Estadística INE | 6.098 | 5.744 | 5.496 | 5.514 | 4.888 | 4.522 | 4.144 | 3.811 | **3.030** | **2.588b** | 2.366b |  | 2.116b | | 1.915b | | 40.390 | |
| Diferencia INE -DGT | 5,57% | 4,11% | 2,79% | 2,13% | 3,10% | 1,80% | 0,97% | -0,31% | -2,26% | -4,64% | -4,52% |  | 2,72% | | 0,63% | | 0,70% | |
|  |  |  |  |  |  |  |  |  |  |  |  |  | |  | |  | |

Elaboración propia a partir de datos del INE y de la DGT.

a Cálculo basado en nuevos factores correctores, deducidos del cruce de datos policiales sobre heridos graves y el *Registro de defunciones* del INE8.

b Uso del nuevo certificado médico de defunción.
